# Supplementary material for: Dimetallofullerene M2@C100 or carbide cluster fullerene M2C2@C98 (M = La, Y, and Sc): which ones are more stable?
Source: Royal Society of Chemistry journal article supplement (doi:10.1039/c7ra00717e), 2017-01-01

Supporting information for

**Dimetallofullerene  $M_2@C_{100}$  or Carbide Cluster Fullerene  
 $M_2C_2@C_{98}$  (M= La, Y, Sc): Which Ones Are More Stable?**

Lei Mu<sup>1</sup>, Xiaodi Bao<sup>1</sup>, Shumei Yang<sup>1</sup>, Xianglei Kong<sup>1,2\*</sup>

---

<sup>1</sup>The State Key Laboratory of Elemento-organic Chemistry, Nankai University, Tianjin, 300071, China.

<sup>2</sup>Collaborative Innovation Center of Chemical Science and Engineering, Nankai University, Tianjin 300071, China

Correspondence to: Xianglei Kong; email: [kongxianglei@nankai.edu.cn](mailto:kongxianglei@nankai.edu.cn),

---

## Contents

**Table S1** Relative energies of  $C_{98}^{4-}$  optimized at AM1 level.

**Table S2** Relative energies and HOMO-LUMO Gaps of  $C_{98}^{4-}$  optimized at B3LYP/6-31G level.

**Table S3** Coordinates of main  $M_2C_{100}$  isomers predicted at B3LYP/6-31G(d) ~ Lanl2dz level.

**Table S4** Relative energies (in kcal/mol) of two different electronic states of some important isomers at B3LYP/6-31G(d) ~ Lanl2dz level.

**Table S5** Relative energies (in kcal/mol) and HOMO-LUMO gaps (in eV) of  $La_2C_2@C_1(230933)-C_{98}$  and  $La_2@D_5(285913)-C_{100}$ , obtained on the levels of B3LYP/6-31G(d) ~ Lanl2dz and M06-2X/6-31G(d) ~ Lanl2dz, respectively.

**Table S6** Relative energies (in kcal/mol) and HOMO-LUMO gaps (in eV) of  $Y_2C_2@C_1(230933)-C_{98}$  and  $Y_2@D_5(285913)-C_{100}$ , obtained on the

levels of B3LYP/6-31G(d) ~ Lanl2dz and M06-2X/6-31G(d) ~ Lanl2dz, respectively.

**Table S7** Relative energies (in kcal/mol) and HOMO-LUMO gaps (in eV) of  $\text{Sc}_2\text{C}_2@C_{11}(230933)\text{-C}_{98}$  and  $\text{Sc}_2@D_5(285913)\text{-C}_{100}$ , obtained on the levels of B3LYP/6-31G(d) ~ Lanl2dz and M06-2X/6-31G(d) ~ Lanl2dz, respectively.

**Table S8** NBO bonding analysis about two carbon atoms in cage

**Figure S1** Corresponding energy orders of isomers of (a)  $\text{La}_2\text{C}_{100}$ , (b)  $\text{Y}_2\text{C}_{100}$  and (c)  $\text{Sc}_2\text{C}_{100}$ , obtained at the level of B3LYP/6-31G(d) ~ Lanl2dz. Squares indicate isomers of  $\text{M}_2@C_{100}$  (M = La, Y, Sc), and circles indicate isomers of  $\text{M}_2\text{C}_2@C_{98}$  (M= La, Y, Sc), respectively.

**Figure S2** NBO charge distributions of the most stable isomers of  $\text{M}_2@C_{100}$  and  $\text{M}_2\text{C}_2@C_{98}$  (M= La, Y, Sc). Green represents positive charge and red represents negative charge.

**Figure S3** Simulated IR spectra of main  $\text{M}_2\text{C}_{100}$  isomers.

**Table S1** Relative energies of  $C_{98}^{4-}$  optimized at AM1 level.

| Spiral ID | Symmetry | PA | $\Delta E$ (kcal/mol) |
|-----------|----------|----|-----------------------|
| 230925    | $C_{2v}$ | 0  | 0                     |
| 230924    | $C_2$    | 0  | 0.27                  |
| 230926    | $C_1$    | 0  | 0.60                  |
| 230933    | $C_1$    | 0  | 0.69                  |
| 230979    | $C_2$    | 0  | 1.14                  |
| 230927    | $C_1$    | 0  | 3.23                  |
| 230941    | $C_2$    | 0  | 3.32                  |
| 230839    | $C_1$    | 0  | 3.44                  |
| 230938    | $C_1$    | 0  | 4.97                  |
| 230931    | $C_1$    | 0  | 5.43                  |
| 230889    | $C_1$    | 0  | 6.54                  |
| 230932    | $C_2$    | 0  | 6.63                  |
| 230969    | $C_2$    | 0  | 6.83                  |
| 231005    | $C_1$    | 0  | 7.19                  |
| 230947    | $C_2$    | 0  | 7.33                  |
| 231004    | $C_2$    | 0  | 7.79                  |
| 230991    | $C_2$    | 0  | 7.90                  |
| 230930    | $C_1$    | 0  | 7.93                  |
| 230942    | $C_1$    | 0  | 8.15                  |
| 230830    | $C_2$    | 0  | 8.73                  |
| 230984    | $C_1$    | 0  | 9.04                  |
| 230992    | $C_1$    | 0  | 10.21                 |
| 230844    | $C_1$    | 0  | 10.37                 |
| 230919    | $C_1$    | 0  | 10.53                 |
| 230917    | $C_1$    | 0  | 11.33                 |
| 230902    | $C_1$    | 0  | 11.36                 |
| 230970    | $C_1$    | 0  | 11.54                 |
| 230982    | $C_1$    | 0  | 11.60                 |
| 230983    | $C_2$    | 0  | 11.75                 |
| 230895    | $C_1$    | 0  | 11.77                 |

---

|        |       |   |       |
|--------|-------|---|-------|
| 230847 | $C_2$ | 0 | 12.33 |
| 230883 | $C_1$ | 0 | 12.39 |
| 230989 | $C_2$ | 0 | 12.56 |
| 230944 | $C_1$ | 0 | 12.63 |
| 231000 | $C_2$ | 0 | 12.79 |
| 230963 | $C_s$ | 0 | 12.80 |
| 230899 | $C_1$ | 0 | 12.80 |
| 230882 | $C_1$ | 0 | 13.35 |
| 230923 | $C_1$ | 0 | 13.63 |
| 230898 | $C_1$ | 0 | 13.65 |
| 230890 | $C_1$ | 0 | 13.66 |
| 230903 | $C_1$ | 0 | 13.69 |
| 230940 | $C_2$ | 0 | 13.70 |
| 230905 | $C_2$ | 0 | 13.75 |
| 230921 | $C_1$ | 0 | 13.90 |
| 230833 | $C_1$ | 0 | 14.31 |
| 230934 | $C_2$ | 0 | 14.51 |
| 230937 | $C_1$ | 0 | 14.93 |
| 230827 | $C_1$ | 0 | 15.52 |
| 230901 | $C_1$ | 0 | 15.73 |
| 230946 | $C_2$ | 0 | 15.78 |
| 230832 | $C_2$ | 0 | 15.79 |
| 230935 | $C_1$ | 0 | 15.85 |
| 230879 | $C_1$ | 0 | 15.87 |
| 230976 | $C_s$ | 0 | 16.09 |
| 230928 | $C_1$ | 0 | 16.36 |
| 230929 | $C_1$ | 0 | 16.54 |
| 230985 | $C_1$ | 0 | 16.55 |
| 230948 | $C_1$ | 0 | 16.59 |
| 230966 | $C_1$ | 0 | 16.81 |
| 230878 | $C_s$ | 0 | 17.14 |
| 230600 | $C_1$ | 1 | 18.04 |
| 219677 | $C_1$ | 1 | 18.23 |
| 230943 | $C_s$ | 0 | 18.30 |
| 231013 | $C_1$ | 0 | 18.40 |

---

---

|        |       |   |       |
|--------|-------|---|-------|
| 231002 | $C_1$ | 0 | 18.44 |
| 230728 | $C_1$ | 1 | 18.51 |
| 229418 | $C_1$ | 1 | 18.55 |
| 231014 | $C_2$ | 0 | 18.59 |
| 230837 | $C_1$ | 0 | 19.24 |
| 219676 | $C_1$ | 1 | 19.45 |
| 230877 | $C_s$ | 0 | 19.46 |
| 230765 | $C_s$ | 0 | 19.66 |
| 230872 | $C_1$ | 0 | 19.68 |
| 220108 | $C_1$ | 1 | 20.02 |
| 230953 | $C_1$ | 0 | 20.15 |
| 172198 | $C_1$ | 1 | 20.96 |
| 230962 | $C_1$ | 0 | 20.97 |
| 230965 | $C_1$ | 0 | 21.18 |
| 230981 | $C_1$ | 0 | 21.29 |
| 170811 | $C_1$ | 1 | 21.36 |
| 230880 | $C_1$ | 0 | 21.48 |
| 229404 | $C_1$ | 1 | 21.80 |
| 228592 | $C_1$ | 1 | 21.79 |
| 230986 | $C_1$ | 0 | 21.80 |
| 229416 | $C_1$ | 1 | 21.81 |
| 230957 | $C_s$ | 0 | 22.09 |
| 230975 | $C_1$ | 0 | 22.36 |
| 231012 | $C_2$ | 0 | 22.71 |
| 229408 | $C_1$ | 1 | 22.73 |
| 229329 | $C_1$ | 1 | 22.90 |
| 230599 | $C_1$ | 1 | 22.92 |
| 231011 | $C_3$ | 0 | 22.93 |
| 230859 | $C_1$ | 0 | 22.99 |
| 230913 | $C_1$ | 0 | 23.04 |
| 230977 | $C_1$ | 0 | 23.15 |
| 229413 | $C_1$ | 1 | 23.21 |
| 230912 | $C_1$ | 0 | 23.36 |
| 219722 | $C_1$ | 1 | 23.37 |
| 230470 | $C_1$ | 1 | 23.47 |

---

**Table S2** Relative energies and HOMO-LUMO Gaps of  $C_{98}^{4-}$  optimized at B3LYP/6-31G level.

| Spiral ID | Symmetry | PA | $\Delta E(\text{kcal/mol})$ | Gap(eV) |
|-----------|----------|----|-----------------------------|---------|
| 230979    | $C_2$    | 0  | 0                           | 1.41    |
| 230933    | $C_1$    | 0  | 0.36                        | 1.11    |
| 230926    | $C_1$    | 0  | 0.70                        | 1.19    |
| 230925    | $C_{2v}$ | 0  | 0.74                        | 1.24    |
| 230924    | $C_2$    | 0  | 1.08                        | 0.87    |
| 230927    | $C_1$    | 0  | 3.33                        | 1.43    |
| 230941    | $C_2$    | 0  | 3.61                        | 1.28    |
| 230839    | $C_1$    | 0  | 4.42                        | 1.41    |
| 230931    | $C_1$    | 0  | 4.66                        | 1.25    |
| 230979    | $C_2$    | 0  | 4.70                        | 1.31    |

**Table S3** Coordinates of main  $M_2C_{100}$  isomers predicted at B3LYP/6-

31G(d) ~ Lanl2dz level.

$La_2@D_5(285913)-C_{100}$

xyz file:

|   |             |             |             |
|---|-------------|-------------|-------------|
| C | 2.14446306  | 3.71809459  | 0.66985297  |
| C | 2.81948334  | 3.53170876  | -0.57795116 |
| C | 2.05755242  | 3.39102861  | -1.77157840 |
| C | 2.72297439  | 2.48075333  | -2.63880595 |
| C | 1.96204440  | 1.63185090  | -3.49292302 |
| C | 2.52985979  | 0.36313964  | -3.77781051 |
| C | 1.68764916  | -0.76765401 | -3.97403380 |
| C | 2.32783278  | -1.91646175 | -3.41684710 |
| C | 1.55407029  | -2.92965209 | -2.78988742 |
| C | 2.16532662  | -3.62487786 | -1.71349664 |
| C | 1.37853486  | -4.11754349 | -0.62911709 |
| C | 2.13542557  | -3.99391259 | 0.57585298  |
| C | 1.48575242  | -3.67923571 | 1.79582883  |
| C | 2.22965620  | -2.92034329 | 2.73980652  |
| C | 1.56733900  | -1.99642765 | 3.60631785  |
| C | 2.41496522  | -0.86572018 | 3.79899752  |
| C | 1.85192627  | 0.42459664  | 3.93099636  |
| C | 2.63209175  | 1.51170257  | 3.43310873  |
| C | 1.99124199  | 2.66369537  | 2.88097946  |
| C | 2.77727601  | 3.15165433  | 1.80310793  |
| C | 0.72211640  | 3.95510151  | 0.68508706  |
| C | -0.04311712 | 3.62279056  | 1.88363138  |
| C | 0.59043621  | 2.83846192  | 2.92703341  |
| C | -0.17420789 | 1.85617396  | 3.68256836  |
| C | 0.41693869  | 0.57155030  | 4.03355727  |
| C | -0.42579462 | -0.61694309 | 4.02574429  |
| C | 0.16612515  | -1.89744998 | 3.66102527  |
| C | -0.59661807 | -2.87084470 | 2.89242254  |
| C | 0.03908799  | -3.64350008 | 1.84181480  |
| C | -0.72348482 | -3.96198719 | 0.63775659  |
| C | -0.02389904 | -4.05200770 | -0.63940368 |
| C | -0.65457504 | -3.57400198 | -1.85718859 |
| C | 0.11024328  | -2.86716293 | -2.86570176 |
| C | -0.52523767 | -1.77986935 | -3.60909732 |
| C | 0.28356004  | -0.64801785 | -4.03339890 |
| C | -0.27465164 | 0.69445643  | -4.02624749 |



|   |             |             |             |
|---|-------------|-------------|-------------|
| C | 0.53318167  | 1.82131938  | -3.58689189 |
| C | -0.10395093 | 2.90002486  | -2.83261199 |
| C | 0.65850933  | 3.59503290  | -1.81426995 |
| C | 0.02532031  | 4.05948344  | -0.59257039 |
| C | -1.37708613 | 4.12487046  | -0.58474078 |
| C | -2.13667390 | 3.98759940  | 0.61703122  |
| C | -1.48972561 | 3.65911585  | 1.83478285  |
| C | -2.23587175 | 2.88967530  | 2.76849308  |
| C | -1.57539428 | 1.95583913  | 3.62588023  |
| C | -2.42325736 | 0.82295615  | 3.80337699  |
| C | -1.86040640 | -0.46866431 | 3.92156492  |
| C | -2.63938333 | -1.54970919 | 3.40860039  |
| C | -1.99734475 | -2.69503201 | 2.84460054  |
| C | -2.78136349 | -3.17126239 | 1.76010836  |
| C | -2.14581555 | -3.72504149 | 0.62182324  |
| C | -2.81828215 | -3.52531925 | -0.62507045 |
| C | -2.05380954 | -3.37109643 | -1.81541591 |
| C | -2.71695123 | -2.45013111 | -2.67320509 |
| C | -1.95439560 | -1.59142464 | -3.51598692 |
| C | -2.52146738 | -0.31942334 | -3.78728680 |
| C | -1.67869962 | 0.81352524  | -3.96859013 |
| C | -2.32014248 | 1.95586313  | -3.39975401 |
| C | -1.54793188 | 2.96169745  | -2.75945861 |
| C | -2.16149657 | 3.64455794  | -1.67645462 |
| C | -3.44489135 | 3.24437469  | -1.15486395 |
| C | -3.42715202 | 3.45971770  | 0.27105965  |
| C | -4.10734106 | 2.58572591  | 1.16150846  |
| C | -3.52471013 | 2.34764135  | 2.43381714  |
| C | -3.65154834 | 1.06480821  | 3.08375825  |
| C | -4.36617805 | -0.00499926 | 2.48558528  |
| C | -3.85961814 | -1.32371297 | 2.68958310  |
| C | -3.96860613 | -2.33564380 | 1.65058687  |
| C | -4.65465323 | -2.11767144 | 0.40461171  |
| C | -4.02593068 | -2.72521372 | -0.75002662 |
| C | -3.95090523 | -2.04594337 | -2.04431270 |
| C | -4.47024297 | -0.71740958 | -2.24395146 |
| C | -3.73095773 | 0.12648279  | -3.12187033 |
| C | -3.59734110 | 1.54762396  | -2.89040336 |
| C | -4.15223797 | 2.15797003  | -1.73111572 |
| C | -4.91557145 | 1.30694151  | -0.84446163 |
| C | -4.87875265 | 1.51417801  | 0.57696085  |
| C | -5.05008209 | 0.24384860  | 1.22897402  |
| C | -5.23729531 | -0.78461832 | 0.20393389  |
| C | -5.13532528 | -0.09995291 | -1.10155826 |

|    |              |              |              |
|----|--------------|--------------|--------------|
| C  | 4. 02773374  | 2. 73433052  | -0. 70981272 |
| C  | 3. 95683759  | 2. 07036259  | -2. 01258498 |
| C  | 4. 47754928  | 0. 74405430  | -2. 22686217 |
| C  | 3. 73797968  | -0. 09019155 | -3. 11439569 |
| C  | 3. 60374619  | -1. 51412753 | -2. 89979296 |
| C  | 4. 15650961  | -2. 13792010 | -1. 74657281 |
| C  | 3. 44764127  | -3. 23061760 | -1. 18437474 |
| C  | 3. 42653354  | -3. 46204096 | 0. 23899675  |
| C  | 4. 10468134  | -2. 59812731 | 1. 14086893  |
| C  | 3. 51943519  | -2. 37454602 | 2. 41453135  |
| C  | 3. 64482128  | -1. 09950184 | 3. 07972102  |
| C  | 4. 35975159  | -0. 02262755 | 2. 49473572  |
| C  | 3. 85309423  | 1. 29331042  | 2. 71324878  |
| C  | 3. 96388403  | 2. 31642053  | 1. 68602969  |
| C  | 4. 65192594  | 2. 11233211  | 0. 43957082  |
| C  | 5. 23599404  | 0. 78244031  | 0. 22443636  |
| C  | 5. 13974948  | 0. 11303969  | -1. 08968236 |
| C  | 4. 91857642  | -1. 29709081 | -0. 84889090 |
| C  | 4. 87722949  | -1. 52015759 | 0. 56999431  |
| C  | 5. 04549325  | -0. 25713696 | 1. 23660511  |
| La | 2. 77514037  | 0. 47027000  | -0. 10737791 |
| La | -2. 77511669 | -0. 47173889 | -0. 10099475 |

$Y_2@D_5(285913)-C_{100}$

xyz file:

|   |              |              |              |
|---|--------------|--------------|--------------|
| C | -1. 85261078 | -0. 39808282 | 3. 94646093  |
| C | -2. 62562611 | -1. 49589147 | 3. 46155212  |
| C | -1. 97661147 | -2. 65043258 | 2. 92102129  |
| C | -2. 75381012 | -3. 14532754 | 1. 84261060  |
| C | -2. 11780847 | -3. 71430723 | 0. 71783527  |
| C | -2. 79459420 | -3. 53445772 | -0. 52973518 |
| C | -2. 03037145 | -3. 40064006 | -1. 72074843 |
| C | -2. 70392338 | -2. 51127252 | -2. 59853804 |
| C | -1. 94570128 | -1. 67315700 | -3. 46423728 |
| C | -2. 52086777 | -0. 41276862 | -3. 76250182 |
| C | -1. 68826102 | 0. 71977659  | -3. 97474623 |
| C | -2. 33578333 | 1. 87056376  | -3. 42888525 |
| C | -1. 56947836 | 2. 89507862  | -2. 81010910 |
| C | -2. 18441336 | 3. 59532837  | -1. 74042821 |
| C | -1. 40249484 | 4. 10433599  | -0. 65951607 |
| C | -2. 16004471 | 3. 98783888  | 0. 54635540  |

|   |             |             |             |
|---|-------------|-------------|-------------|
| C | -1.51037544 | 3.68688484  | 1.77013246  |
| C | -2.24981672 | 2.93370862  | 2.72117115  |
| C | -1.58219625 | 2.02180274  | 3.59792832  |
| C | -2.42268362 | 0.88727709  | 3.79942574  |
| C | -0.41724724 | -0.53392421 | 4.05204241  |
| C | 0.41759688  | 0.65893040  | 4.03372324  |
| C | -0.18183364 | 1.93315175  | 3.65692115  |
| C | 0.57610655  | 2.90450618  | 2.87993497  |
| C | -0.06378812 | 3.66004003  | 1.81862303  |
| C | 0.69685849  | 3.96958522  | 0.61284851  |
| C | -0.00092475 | 4.04400504  | -0.66635734 |
| C | 0.63240024  | 3.55275811  | -1.87682844 |
| C | -0.12527522 | 2.83779673  | -2.88221942 |
| C | 0.51701045  | 1.74708906  | -3.61455452 |
| C | -0.28322254 | 0.60704682  | -4.03202786 |
| C | 0.28286207  | -0.73146633 | -4.01163294 |
| C | -0.51736606 | -1.85824807 | -3.55943250 |
| C | 0.12502071  | -2.92572932 | -2.79362727 |
| C | -0.63261205 | -3.60923202 | -1.76653911 |
| C | 0.00084387  | -4.06249340 | -0.54138085 |
| C | -0.69678506 | -3.94835038 | 0.73492626  |
| C | 0.06392908  | -3.60205874 | 1.93058500  |
| C | -0.57582280 | -2.81408488 | 2.96813899  |
| C | 0.18215973  | -1.81909170 | 3.71450927  |
| C | 1.58245810  | -1.90961876 | 3.65833855  |
| C | 2.42301036  | -0.76947999 | 3.82488479  |
| C | 1.85298060  | 0.51985070  | 3.93228143  |
| C | 2.62603070  | 1.60218812  | 3.41367059  |
| C | 1.97691744  | 2.73948309  | 2.83777656  |
| C | 2.75403985  | 3.20087125  | 1.74457643  |
| C | 2.11795058  | 3.73503334  | 0.60286007  |
| C | 2.79452904  | 3.51633094  | -0.63865794 |
| C | 2.03011197  | 3.34557701  | -1.82472773 |
| C | 2.70358022  | 2.42962682  | -2.67479821 |
| C | 1.94529520  | 1.56514928  | -3.51402899 |
| C | 2.52050842  | 0.29630736  | -3.77363123 |
| C | 1.68796322  | -0.84232246 | -3.95107396 |
| C | 2.33555292  | -1.97571553 | -3.36991344 |
| C | 1.56927395  | -2.98065733 | -2.71973033 |
| C | 2.18425829  | -3.64743148 | -1.62887794 |
| C | 1.40239969  | -4.12261145 | -0.53269037 |
| C | 2.16007033  | -3.96897970 | 0.66896225  |
| C | 1.51049302  | -3.63040893 | 1.88288226  |
| C | 2.24996059  | -2.84819544 | 2.81015585  |

|   |              |              |              |
|---|--------------|--------------|--------------|
| C | 3. 53307220  | -2. 29919860 | 2. 47015455  |
| C | 3. 65102345  | -1. 01043085 | 3. 10759928  |
| C | 4. 34664333  | 0. 05884974  | 2. 49299695  |
| C | 3. 83809634  | 1. 37249366  | 2. 69013124  |
| C | 3. 93854057  | 2. 36272067  | 1. 63353859  |
| C | 4. 64507745  | 2. 15167816  | 0. 40178141  |
| C | 4. 02230891  | 2. 75011065  | -0. 76289892 |
| C | 3. 95544737  | 2. 05720025  | -2. 05320635 |
| C | 4. 48480474  | 0. 72801927  | -2. 24145007 |
| C | 3. 72938682  | -0. 13165676 | -3. 09438204 |
| C | 3. 60389798  | -1. 55266772 | -2. 85808231 |
| C | 4. 16026882  | -2. 14601864 | -1. 69291678 |
| C | 3. 46402656  | -3. 23275233 | -1. 10851574 |
| C | 3. 44477985  | -3. 43400917 | 0. 31878224  |
| C | 4. 11240207  | -2. 54218335 | 1. 19912286  |
| C | 4. 85997270  | -1. 46491570 | 0. 60065522  |
| C | 5. 02098638  | -0. 18900304 | 1. 23473923  |
| C | 5. 24655355  | 0. 82664992  | 0. 21035930  |
| C | 5. 15997162  | 0. 12806221  | -1. 09383438 |
| C | 4. 91150493  | -1. 27340372 | -0. 81813184 |
| C | -3. 83783553 | -1. 28874050 | 2. 73144594  |
| C | -3. 93833450 | -2. 31113869 | 1. 70589625  |
| C | -4. 64499907 | -2. 13828907 | 0. 46832218  |
| C | -4. 02238908 | -2. 77244669 | -0. 67739266 |
| C | -3. 95569597 | -2. 11971435 | -1. 98849706 |
| C | -4. 48506506 | -0. 79694620 | -2. 21758091 |
| C | -3. 72961801 | 0. 03597755  | -3. 09657182 |
| C | -3. 60419518 | 1. 46363870  | -2. 90435144 |
| C | -4. 16051686 | 2. 09277103  | -1. 75805309 |
| C | -3. 46420481 | 3. 19704961  | -1. 20752712 |
| C | -3. 44479021 | 3. 44230858  | 0. 21286124  |
| C | -4. 11229961 | 2. 57803515  | 1. 12034803  |
| C | -3. 53296807 | 2. 37450211  | 2. 39831249  |
| C | -3. 65074870 | 1. 10594637  | 3. 07510909  |
| C | -4. 34642567 | 0. 01820638  | 2. 49393053  |
| C | -5. 02078005 | 0. 22702504  | 1. 22866489  |
| C | -5. 24639845 | -0. 81979999 | 0. 23615976  |
| C | -5. 16007520 | -0. 16181194 | -1. 08899232 |
| C | -4. 91155242 | 1. 24751106  | -0. 85665547 |
| C | -4. 85984296 | 1. 48273410  | 0. 55550987  |
| Y | -2. 96704931 | -0. 58418588 | -0. 23019631 |
| Y | 2. 96707198  | 0. 57682465  | -0. 24800980 |

$\text{Sc}_2@D_5(285913)-C_{100}$

xyz file:

|   |             |             |             |
|---|-------------|-------------|-------------|
| C | -1.83921853 | 3.84076271  | 0.98800357  |
| C | -2.58284517 | 3.20862114  | 2.02919824  |
| C | -1.90169477 | 2.51188890  | 3.08000624  |
| C | -2.66369672 | 1.37135184  | 3.43654533  |
| C | -2.01543330 | 0.18143119  | 3.82903344  |
| C | -2.69371509 | -1.02958982 | 3.49445212  |
| C | -1.93773461 | -2.19198382 | 3.18433940  |
| C | -2.63247117 | -2.93624764 | 2.19673872  |
| C | -1.89908668 | -3.67347659 | 1.22906371  |
| C | -2.50761677 | -3.79473469 | -0.04528709 |
| C | -1.70726427 | -3.84863091 | -1.21716175 |
| C | -2.38603913 | -3.15395134 | -2.26643479 |
| C | -1.64732434 | -2.39743967 | -3.21612075 |
| C | -2.28000469 | -1.24428467 | -3.74585064 |
| C | -1.51145487 | -0.10063286 | -4.12099233 |
| C | -2.26487383 | 1.07509532  | -3.81702520 |
| C | -1.60719055 | 2.24686656  | -3.36559671 |
| C | -2.32541218 | 3.08251278  | -2.46942323 |
| C | -1.63317675 | 3.82950010  | -1.46327715 |
| C | -2.44300808 | 3.87044097  | -0.28989199 |
| C | -0.40108099 | 3.93080437  | 1.09816262  |
| C | 0.40056617  | 4.07986966  | -0.10636964 |
| C | -0.23280186 | 3.88019367  | -1.40473732 |
| C | 0.49938430  | 3.24673829  | -2.49418357 |
| C | -0.16079637 | 2.29561796  | -3.37149151 |
| C | 0.58929206  | 1.14844351  | -3.86545906 |
| C | -0.10946934 | -0.11079829 | -4.09966508 |
| C | 0.53667823  | -1.37668461 | -3.79872921 |
| C | -0.20218579 | -2.47227438 | -3.20817452 |
| C | 0.46755807  | -3.34475121 | -2.24493019 |
| C | -0.30068049 | -3.91673572 | -1.15169250 |
| C | 0.30126902  | -4.07970241 | 0.16214776  |
| C | -0.46717880 | -3.79194980 | 1.36193801  |
| C | 0.20251114  | -3.18038766 | 2.50874645  |
| C | -0.53649954 | -2.26187416 | 3.34842645  |
| C | 0.10957246  | -1.10721576 | 3.94833932  |
| C | -0.58934007 | 0.17090932  | 4.02871251  |
| C | 0.16066823  | 1.40401636  | 3.82972251  |
| C | -0.49957989 | 2.54042389  | 3.21080718  |
| C | 0.23232245  | 3.42037711  | 2.30858540  |
| C | 1.63266754  | 3.35659256  | 2.35285014  |
| C | 2.44235440  | 3.68223183  | 1.22487333  |

|   |              |              |              |
|---|--------------|--------------|--------------|
| C | 1. 83865764  | 3. 96556733  | -0. 02146165 |
| C | 2. 58260493  | 3. 60683227  | -1. 18533099 |
| C | 1. 90157553  | 3. 18765397  | -2. 37449387 |
| C | 2. 66369093  | 2. 16865502  | -2. 99856427 |
| C | 2. 01533212  | 1. 11015478  | -3. 66887165 |
| C | 2. 69380051  | -0. 14583890 | -3. 63941049 |
| C | 1. 93788605  | -1. 34873115 | -3. 62210228 |
| C | 2. 63281433  | -2. 31150917 | -2. 84600792 |
| C | 1. 89938001  | -3. 26224278 | -2. 08711290 |
| C | 2. 50809216  | -3. 69120059 | -0. 88120686 |
| C | 1. 70792955  | -4. 02992029 | 0. 24219986  |
| C | 2. 38664324  | -3. 61158738 | 1. 42921044  |
| C | 1. 64773721  | -3. 10929256 | 2. 53447737  |
| C | 2. 28023244  | -2. 11983829 | 3. 32913972  |
| C | 1. 51149224  | -1. 10235875 | 3. 97141899  |
| C | 2. 26493276  | 0. 11187600  | 3. 96407413  |
| C | 1. 60709577  | 1. 35825650  | 3. 81198471  |
| C | 2. 32507955  | 2. 38720334  | 3. 14656642  |
| C | 3. 59139854  | 2. 13160602  | 2. 52207275  |
| C | 3. 67490366  | 2. 94206651  | 1. 33111685  |
| C | 4. 33599601  | 2. 48329908  | 0. 16863446  |
| C | 3. 79552687  | 2. 86251266  | -1. 08900944 |
| C | 3. 86204092  | 1. 94469253  | -2. 21003652 |
| C | 4. 56883549  | 0. 70158864  | -2. 18795227 |
| C | 3. 93311744  | -0. 36813919 | -2. 92200020 |
| C | 3. 89039218  | -1. 73825088 | -2. 41709902 |
| C | 4. 46340481  | -2. 11092768 | -1. 14971153 |
| C | 3. 72536794  | -3. 07183795 | -0. 39547387 |
| C | 3. 64084322  | -3. 04229238 | 1. 04796691  |
| C | 4. 21200080  | -1. 96774208 | 1. 77997320  |
| C | 3. 54832386  | -1. 54193096 | 2. 95498019  |
| C | 3. 53335517  | -0. 15617997 | 3. 35079143  |
| C | 4. 17508732  | 0. 84082838  | 2. 57139414  |
| C | 4. 88230483  | 0. 39805779  | 1. 39870778  |
| C | 5. 00224027  | 1. 19936359  | 0. 21785804  |
| C | 5. 22415417  | 0. 33064664  | -0. 93140058 |
| C | 5. 16616872  | -1. 05945504 | -0. 41975464 |
| C | 4. 93311744  | -0. 97791671 | 1. 01098393  |
| C | -3. 79582638 | 2. 51027034  | 1. 75433869  |
| C | -3. 86235748 | 1. 34679708  | 2. 61787066  |
| C | -4. 56853328 | 0. 14633791  | 2. 29279970  |
| C | -3. 93254030 | -1. 06984257 | 2. 74376440  |
| C | -3. 88996516 | -2. 27553702 | 1. 92024542  |
| C | -4. 46301986 | -2. 32785595 | 0. 60034530  |

|    |             |             |             |
|----|-------------|-------------|-------------|
| C  | -3.72506050 | -3.07599075 | -0.36527625 |
| C  | -3.64041401 | -2.69516411 | -1.75796129 |
| C  | -4.21178257 | -1.47480285 | -2.20605459 |
| C  | -3.54790277 | -0.77515973 | -3.24157980 |
| C  | -3.53305589 | 0.66532227  | -3.28737363 |
| C  | -4.17470746 | 1.44198606  | -2.28831042 |
| C  | -3.59138288 | 2.68195260  | -1.92589884 |
| C  | -3.67521871 | 3.17774313  | -0.57335062 |
| C  | -4.33631660 | 2.44938817  | 0.44229382  |
| C  | -5.00220012 | 1.21578666  | 0.08151751  |
| C  | -5.22458894 | 0.09291673  | 0.98406647  |
| C  | -5.16662551 | -1.13058159 | 0.14877914  |
| C  | -4.93297839 | -0.70238840 | -1.21882083 |
| C  | -4.88128882 | 0.72649180  | -1.25882597 |
| Sc | -3.13412479 | -0.40410860 | 0.62566605  |
| Sc | 3.13305038  | -0.23951487 | -0.70775678 |

$\text{La}_2\text{C}_2@C_1(230933)-C_{98}$

xyz file:

|   |             |             |            |
|---|-------------|-------------|------------|
| C | 4.25894418  | 1.75701130  | 0.94465311 |
| C | 3.40632119  | 2.85134774  | 1.27341907 |
| C | 3.04502855  | 3.70579724  | 0.19445371 |
| C | 1.82834418  | 4.44240375  | 0.23959902 |
| C | 1.08119095  | 4.45872492  | 1.40244530 |
| C | 4.21147898  | 0.54352085  | 1.69611710 |
| C | 3.27040459  | 0.33433051  | 2.76851978 |
| C | 2.39628434  | 1.43127725  | 3.13031986 |
| C | 2.51052233  | 2.70852620  | 2.42264467 |
| C | 1.42970914  | 3.60930677  | 2.50645540 |
| C | 0.88818538  | -0.19483491 | 4.17008821 |
| C | 1.14229371  | 1.13225680  | 3.81247913 |
| C | 2.66525795  | -3.35918766 | 2.24551762 |
| C | 3.42290660  | -2.15275834 | 2.25308934 |
| C | 2.95293904  | -1.04251451 | 3.09528136 |
| C | 1.78409198  | -1.24980166 | 3.87058037 |
| C | -2.14848810 | 3.47259437  | 2.54512097 |
| C | -0.34712277 | 4.58376463  | 1.32428335 |
| C | -0.86939283 | 3.98542739  | 2.52171770 |
| C | -0.01276711 | 2.01546886  | 3.74924528 |
| C | 0.19057211  | 3.27915090  | 3.17959086 |
| C | -2.41378437 | 2.23857283  | 3.21905841 |

|   |             |             |             |
|---|-------------|-------------|-------------|
| C | -1.37787527 | 1.46398749  | 3.76302714  |
| C | -2.98211283 | 3.56599737  | 1.38793121  |
| C | -2.42719613 | 3.99424052  | 0.15043728  |
| C | -1.04233807 | 4.46060241  | 0.09151372  |
| C | -0.24786285 | 4.24670392  | -1.12899960 |
| C | 1.16272776  | 4.34873449  | -1.03277656 |
| C | -2.99497210 | 3.43478501  | -1.02906807 |
| C | -3.91910667 | 2.46775931  | 1.45133742  |
| C | -4.85799345 | 0.53354302  | 0.30395568  |
| C | -4.47861560 | 1.92051237  | 0.27518614  |
| C | -4.04222897 | 2.45575676  | -0.97747764 |
| C | -0.46814969 | -0.74320431 | 4.16065326  |
| C | -1.58712282 | 0.02615042  | 3.82847147  |
| C | -2.70016993 | -0.63291100 | 3.15472665  |
| C | -3.69318251 | 0.22387542  | 2.51926705  |
| C | -3.54102177 | 1.62426379  | 2.56572448  |
| C | -4.46965190 | -0.28585588 | 1.42236168  |
| C | -2.17983477 | 3.15169854  | -2.17181899 |
| C | -0.78843395 | 3.44827978  | -2.21714737 |
| C | 0.06981952  | 2.59965356  | -3.02545826 |
| C | 1.50683015  | 2.74283956  | -2.87362352 |
| C | 2.03243169  | 3.63241810  | -1.90890640 |
| C | 2.36317852  | 1.66541690  | -3.26367349 |
| C | -2.72683371 | 2.02474661  | -2.84118688 |
| C | -2.36900207 | -0.23472623 | -3.60857868 |
| C | -1.88510076 | 1.10588110  | -3.51779606 |
| C | -0.46740455 | 1.36215144  | -3.60583215 |
| C | 0.41087389  | 0.22242763  | -3.82997948 |
| C | 1.80724490  | 0.42860702  | -3.69456503 |
| C | -4.91760615 | -0.30205387 | -0.88625380 |
| C | -4.37032006 | 0.22550613  | -2.13517463 |
| C | -3.91912765 | 1.58890277  | -2.12691509 |
| C | -3.58438724 | -0.68136847 | -2.93778411 |
| C | 3.65222427  | 1.39703861  | -2.66005140 |
| C | 4.06921772  | 2.18430778  | -1.51405761 |
| C | 3.25456068  | 3.29023764  | -1.18123035 |
| C | 4.68568108  | 1.45722397  | -0.41419487 |
| C | 3.87319731  | -0.03482709 | -2.72545559 |
| C | 4.09378591  | -2.08220020 | -1.41959347 |
| C | 4.52652416  | -0.75289111 | -1.64829614 |
| C | 4.91850386  | 0.02492703  | -0.48023207 |
| C | -1.45650353 | -1.32669805 | -3.64924980 |
| C | -0.05636055 | -1.14440765 | -3.71970403 |
| C | 0.80001146  | -2.21400530 | -3.20647631 |



|    |              |              |              |
|----|--------------|--------------|--------------|
| C  | 2. 21443269  | -1. 93592472 | -3. 06634373 |
| C  | 2. 70691269  | -0. 62264334 | -3. 36414383 |
| C  | 2. 99956057  | -2. 69891379 | -2. 17273825 |
| C  | 4. 64177136  | -0. 52057611 | 0. 84241224  |
| C  | 4. 06807328  | -2. 67616173 | -0. 09890279 |
| C  | 4. 21692606  | -1. 87121567 | 1. 06727670  |
| C  | 3. 11935030  | -3. 74620790 | -0. 12661564 |
| C  | -1. 01146479 | -4. 51782144 | -0. 14639597 |
| C  | 0. 39525116  | -4. 56583927 | -0. 26350391 |
| C  | 1. 10289292  | -4. 57148862 | 0. 97022644  |
| C  | 2. 46996349  | -4. 10425822 | 1. 04018720  |
| C  | -2. 04727600 | -2. 44905663 | -2. 99884165 |
| C  | -1. 83221934 | -4. 04623355 | -1. 21290524 |
| C  | -1. 23786290 | -3. 41163317 | -2. 33433021 |
| C  | 0. 21556511  | -3. 31907554 | -2. 44979153 |
| C  | 1. 02405578  | -4. 01985708 | -1. 46845345 |
| C  | 2. 40987301  | -3. 71951658 | -1. 38387456 |
| C  | -4. 61024264 | -1. 66145682 | -0. 45834365 |
| C  | -3. 05949489 | -3. 54270897 | -0. 64166504 |
| C  | -3. 85864673 | -2. 57005392 | -1. 29056541 |
| C  | -3. 35845182 | -2. 05769365 | -2. 53993105 |
| C  | -0. 39600780 | -2. 12442569 | 3. 87282072  |
| C  | -1. 38106880 | -2. 77116797 | 3. 08447622  |
| C  | -2. 57276535 | -2. 02308586 | 2. 73602367  |
| C  | -2. 89965920 | -3. 56891980 | 0. 80257522  |
| C  | -3. 38576162 | -2. 51069252 | 1. 60729704  |
| C  | -4. 31840169 | -1. 62700693 | 0. 96912021  |
| C  | 0. 45848072  | -4. 21660806 | 2. 19826372  |
| C  | 1. 43084886  | -3. 48158186 | 2. 97526765  |
| C  | 1. 00449544  | -2. 46036858 | 3. 77847798  |
| C  | -1. 66108689 | -4. 20981193 | 1. 09338331  |
| C  | -0. 91987244 | -3. 88411838 | 2. 25113397  |
| La | -2. 28513723 | -0. 31053228 | -0. 54298447 |
| La | 2. 25355762  | 0. 32573590  | -0. 57381096 |
| C  | 0. 18090568  | -0. 64261399 | 0. 56280115  |
| C  | -0. 17828719 | 0. 56989145  | 0. 56744368  |

$Y_2C_2@C_1(230933)-C_{98}$

xyz file:

|   |              |              |              |
|---|--------------|--------------|--------------|
| C | 4. 20086234  | 1. 82274765  | 0. 93286233  |
| C | 3. 34208431  | 2. 90852691  | 1. 26400618  |
| C | 2. 97808276  | 3. 75866809  | 0. 18586724  |
| C | 1. 75334686  | 4. 47904970  | 0. 22444034  |
| C | 1. 00197889  | 4. 48450231  | 1. 38483855  |
| C | 4. 16134283  | 0. 61184941  | 1. 68270337  |
| C | 3. 24008916  | 0. 39410388  | 2. 76551849  |
| C | 2. 35444328  | 1. 47909003  | 3. 12406780  |
| C | 2. 45108808  | 2. 75552238  | 2. 41276406  |
| C | 1. 35887254  | 3. 64113311  | 2. 49136215  |
| C | 0. 87411589  | -0. 16801885 | 4. 16610344  |
| C | 1. 10598236  | 1. 16270582  | 3. 80480985  |
| C | 2. 70879693  | -3. 30884482 | 2. 25540701  |
| C | 3. 44371442  | -2. 08926220 | 2. 26092141  |
| C | 2. 95294479  | -0. 98518596 | 3. 09895976  |
| C | 1. 78839638  | -1. 20958256 | 3. 87480761  |
| C | -2. 21359621 | 3. 44773018  | 2. 51880605  |
| C | -0. 42734761 | 4. 58594898  | 1. 30111855  |
| C | -0. 94441402 | 3. 98210134  | 2. 49945906  |
| C | -0. 06192095 | 2. 02769269  | 3. 73471817  |
| C | 0. 12347930  | 3. 29368305  | 3. 16257560  |
| C | -2. 46217640 | 2. 21171453  | 3. 19631018  |
| C | -1. 41691810 | 1. 45440525  | 3. 74565747  |
| C | -3. 04321743 | 3. 52342066  | 1. 35737643  |
| C | -2. 49237478 | 3. 95830224  | 0. 12050431  |
| C | -1. 11525387 | 4. 44607933  | 0. 06647225  |
| C | -0. 31313030 | 4. 24182962  | -1. 15132134 |
| C | 1. 09360984  | 4. 36956829  | -1. 05027178 |
| C | -3. 04669522 | 3. 39310329  | -1. 06213037 |
| C | -3. 96198798 | 2. 41230808  | 1. 42240276  |
| C | -4. 83374079 | 0. 46013240  | 0. 26844882  |
| C | -4. 49559314 | 1. 85492710  | 0. 24234009  |
| C | -4. 06935976 | 2. 39502972  | -1. 00745718 |
| C | -0. 47264085 | -0. 73821094 | 4. 15596632  |
| C | -1. 60191517 | 0. 01287844  | 3. 81746372  |
| C | -2. 69920013 | -0. 66432471 | 3. 14115020  |
| C | -3. 69514966 | 0. 17673840  | 2. 49658645  |
| C | -3. 57648186 | 1. 57806505  | 2. 54125810  |
| C | -4. 43287715 | -0. 34559296 | 1. 38449044  |
| C | -2. 22185576 | 3. 11956971  | -2. 20248953 |
| C | -0. 83636802 | 3. 43301313  | -2. 24102369 |
| C | 0. 03820461  | 2. 59460776  | -3. 04293674 |

|   |              |              |              |
|---|--------------|--------------|--------------|
| C | 1. 46913414  | 2. 76068819  | -2. 88142305 |
| C | 1. 97609352  | 3. 66219351  | -1. 92011072 |
| C | 2. 34473529  | 1. 69440423  | -3. 25817217 |
| C | -2. 74195562 | 1. 97963158  | -2. 86676464 |
| C | -2. 34371501 | -0. 27880884 | -3. 61426369 |
| C | -1. 88512000 | 1. 07131983  | -3. 53356670 |
| C | -0. 47426502 | 1. 34786542  | -3. 62191409 |
| C | 0. 41904361  | 0. 22047771  | -3. 83552758 |
| C | 1. 80787220  | 0. 44783120  | -3. 68011572 |
| C | -4. 89594322 | -0. 37932484 | -0. 91447731 |
| C | -4. 35352543 | 0. 15572844  | -2. 16083886 |
| C | -3. 92010708 | 1. 52021685  | -2. 14805473 |
| C | -3. 55700161 | -0. 74561949 | -2. 96100027 |
| C | 3. 64495026  | 1. 45471998  | -2. 66734931 |
| C | 4. 03899637  | 2. 25048830  | -1. 51880179 |
| C | 3. 19616313  | 3. 33592617  | -1. 18635226 |
| C | 4. 65848460  | 1. 53401382  | -0. 41512100 |
| C | 3. 88576269  | 0. 02093244  | -2. 72399301 |
| C | 4. 12399533  | -2. 01812423 | -1. 40697184 |
| C | 4. 54321016  | -0. 68721177 | -1. 64151367 |
| C | 4. 91079123  | 0. 10242459  | -0. 47559939 |
| C | -1. 41599441 | -1. 35622599 | -3. 65158186 |
| C | -0. 02090481 | -1. 15330946 | -3. 72451555 |
| C | 0. 84848127  | -2. 20910848 | -3. 20866791 |
| C | 2. 25450004  | -1. 91007179 | -3. 05912614 |
| C | 2. 72308421  | -0. 58652604 | -3. 34736725 |
| C | 3. 04885610  | -2. 65935348 | -2. 16480563 |
| C | 4. 61939694  | -0. 44331258 | 0. 84040151  |
| C | 4. 10714757  | -2. 61260050 | -0. 08600726 |
| C | 4. 23086854  | -1. 80062035 | 1. 07491154  |
| C | 3. 18016161  | -3. 69879416 | -0. 11465877 |
| C | -0. 93556823 | -4. 53449068 | -0. 14678003 |
| C | 0. 47160458  | -4. 55897446 | -0. 25854880 |
| C | 1. 17354881  | -4. 54982093 | 0. 97852206  |
| C | 2. 53236415  | -4. 06193571 | 1. 05200008  |
| C | -1. 99300772 | -2. 48781564 | -3. 00662666 |
| C | -1. 75747950 | -4. 07687022 | -1. 21740310 |
| C | -1. 17038358 | -3. 43659869 | -2. 33898217 |
| C | 0. 27996962  | -3. 32054099 | -2. 45011080 |
| C | 1. 09527592  | -4. 00600622 | -1. 46346896 |
| C | 2. 47604003  | -3. 68773775 | -1. 37588280 |
| C | -4. 57776028 | -1. 73762162 | -0. 48325571 |
| C | -2. 99182021 | -3. 58687727 | -0. 65230849 |
| C | -3. 81059915 | -2. 63706503 | -1. 31169477 |

|   |             |             |             |
|---|-------------|-------------|-------------|
| C | -3.31727333 | -2.12178787 | -2.56319353 |
| C | -0.37623682 | -2.11962557 | 3.87301870  |
| C | -1.34628696 | -2.78266759 | 3.08026421  |
| C | -2.54569260 | -2.05220467 | 2.72454099  |
| C | -2.83816662 | -3.61022221 | 0.79287111  |
| C | -3.33676285 | -2.55431148 | 1.59044659  |
| C | -4.26843253 | -1.68465107 | 0.93804680  |
| C | 0.51869961  | -4.20235132 | 2.20431051  |
| C | 1.47548717  | -3.45048243 | 2.98402655  |
| C | 1.02962258  | -2.43349562 | 3.78328134  |
| C | -1.59452315 | -4.23324253 | 1.09046758  |
| C | -0.86453542 | -3.89063719 | 2.25080734  |
| C | 0.37435707  | -0.22357224 | 0.10257119  |
| C | -0.64661184 | 0.44892799  | 0.39623388  |
| Y | -2.43551670 | -0.46969786 | -0.67450538 |
| Y | 2.43301736  | 0.40986758  | -0.71698968 |

$\text{Sc}_2\text{C}_2@C_1(230933)-C_{98}$

xyz file:

|   |             |             |            |
|---|-------------|-------------|------------|
| C | 4.11936423  | 1.96034577  | 0.90222925 |
| C | 3.23307920  | 3.01790620  | 1.24190559 |
| C | 2.84194820  | 3.86133298  | 0.16927765 |
| C | 1.59498167  | 4.53876422  | 0.21174896 |
| C | 0.84729255  | 4.51507361  | 1.37384529 |
| C | 4.12485703  | 0.74922192  | 1.64769320 |
| C | 3.22416106  | 0.49755121  | 2.73561630 |
| C | 2.30545456  | 1.55074360  | 3.10102955 |
| C | 2.35497666  | 2.83126828  | 2.39333313 |
| C | 1.23477881  | 3.68004860  | 2.47663952 |
| C | 0.88698797  | -0.15132960 | 4.14015327 |
| C | 1.07150026  | 1.18856972  | 3.78326871 |
| C | 2.82347859  | -3.22127462 | 2.21238603 |
| C | 3.51234884  | -1.97597080 | 2.21881039 |
| C | 2.98664129  | -0.89241601 | 3.06241821 |
| C | 1.83548122  | -1.16069839 | 3.84290563 |
| C | -2.32787015 | 3.36387692  | 2.50854882 |
| C | -0.58449007 | 4.56702871  | 1.29158625 |
| C | -1.07826003 | 3.94146132  | 2.48908586 |
| C | -0.12538310 | 2.01371540  | 3.71698145 |
| C | 0.01405908  | 3.28752371  | 3.14827786 |
| C | -2.53073338 | 2.11673757  | 3.18102168 |

|   |             |             |             |
|---|-------------|-------------|-------------|
| C | -1.45876195 | 1.39337093  | 3.72583577  |
| C | -3.16130512 | 3.41471943  | 1.34764433  |
| C | -2.62835632 | 3.87311593  | 0.11097080  |
| C | -1.26911916 | 4.40847238  | 0.05719938  |
| C | -0.46411410 | 4.23603541  | -1.16324555 |
| C | 0.93688805  | 4.41136314  | -1.06283392 |
| C | -3.16468994 | 3.29471078  | -1.07312758 |
| C | -4.03709144 | 2.27065201  | 1.40738403  |
| C | -4.82414902 | 0.29407913  | 0.24505410  |
| C | -4.55007864 | 1.70171244  | 0.22491535  |
| C | -4.15091441 | 2.26269548  | -1.02107997 |
| C | -0.43802784 | -0.76793903 | 4.12794501  |
| C | -1.59209938 | -0.05433564 | 3.79202042  |
| C | -2.66357180 | -0.76649233 | 3.11312876  |
| C | -3.68465843 | 0.04218273  | 2.47185096  |
| C | -3.62007512 | 1.44575239  | 2.52205338  |
| C | -4.39248464 | -0.49914240 | 1.35357597  |
| C | -2.33313595 | 3.05269792  | -2.21741896 |
| C | -0.96120734 | 3.41377916  | -2.25596095 |
| C | -0.05984457 | 2.60806269  | -3.06171020 |
| C | 1.36198466  | 2.82165297  | -2.89910723 |
| C | 1.83957009  | 3.73730945  | -1.93594706 |
| C | 2.27252037  | 1.78760619  | -3.27723352 |
| C | -2.81560688 | 1.89868123  | -2.88528886 |
| C | -2.33519057 | -0.34188023 | -3.63466112 |
| C | -1.92963375 | 1.02289311  | -3.55432022 |
| C | -0.53008327 | 1.34709403  | -3.64088804 |
| C | 0.39902799  | 0.25250672  | -3.85578223 |
| C | 1.77763616  | 0.52667635  | -3.69997067 |
| C | -4.87804667 | -0.54203121 | -0.93443891 |
| C | -4.34658455 | 0.02141147  | -2.17119804 |
| C | -3.97069986 | 1.39755742  | -2.16315271 |
| C | -3.52174970 | -0.84876523 | -2.97042157 |
| C | 3.58752664  | 1.59464146  | -2.69871868 |
| C | 3.95371740  | 2.39955092  | -1.54673520 |
| C | 3.06781395  | 3.44691314  | -1.20439891 |
| C | 4.58909177  | 1.69565856  | -0.44526358 |
| C | 3.86834450  | 0.16774512  | -2.75189373 |
| C | 4.18277099  | -1.87081344 | -1.44891000 |
| C | 4.54363539  | -0.52405794 | -1.67399775 |
| C | 4.87993679  | 0.27266396  | -0.51014279 |
| C | -1.37589202 | -1.38885615 | -3.68554946 |
| C | 0.00993538  | -1.13576620 | -3.75203889 |
| C | 0.91462046  | -2.16097406 | -3.23977894 |

|    |              |              |              |
|----|--------------|--------------|--------------|
| C  | 2. 30862158  | -1. 81639273 | -3. 09142352 |
| C  | 2. 72493899  | -0. 47552483 | -3. 36792449 |
| C  | 3. 13152884  | -2. 54375004 | -2. 20700211 |
| C  | 4. 61126485  | -0. 28565969 | 0. 80020217  |
| C  | 4. 18955388  | -2. 46737935 | -0. 13110854 |
| C  | 4. 28274720  | -1. 65581882 | 1. 03113294  |
| C  | 3. 30164691  | -3. 58617089 | -0. 16070830 |
| C  | -0. 78057280 | -4. 56090778 | -0. 18726197 |
| C  | 0. 62608529  | -4. 53748303 | -0. 30222620 |
| C  | 1. 32986007  | -4. 51009608 | 0. 93328929  |
| C  | 2. 67145297  | -3. 97676695 | 1. 00578330  |
| C  | -1. 90836563 | -2. 53929230 | -3. 03790906 |
| C  | -1. 61767406 | -4. 12376330 | -1. 25332200 |
| C  | -1. 05438041 | -3. 46091684 | -2. 37581313 |
| C  | 0. 38770054  | -3. 29700445 | -2. 48936334 |
| C  | 1. 22753132  | -3. 95839355 | -1. 50689299 |
| C  | 2. 59546463  | -3. 59464797 | -1. 42094883 |
| C  | -4. 52965160 | -1. 89887467 | -0. 50968070 |
| C  | -2. 86562689 | -3. 68111614 | -0. 68448473 |
| C  | -3. 72633510 | -2. 76639861 | -1. 34120207 |
| C  | -3. 24151428 | -2. 21988361 | -2. 58353197 |
| C  | -0. 29536048 | -2. 14505272 | 3. 84113661  |
| C  | -1. 24300258 | -2. 83829717 | 3. 04711291  |
| C  | -2. 46477655 | -2. 14687287 | 2. 69313306  |
| C  | -2. 71034729 | -3. 71210243 | 0. 76251570  |
| C  | -3. 23682880 | -2. 67147110 | 1. 55918679  |
| C  | -4. 19359690 | -1. 83044726 | 0. 90527945  |
| C  | 0. 66611842  | -4. 18970333 | 2. 16261651  |
| C  | 1. 59831166  | -3. 40855144 | 2. 94388969  |
| C  | 1. 11982171  | -2. 41020204 | 3. 74861143  |
| C  | -1. 44778674 | -4. 29281699 | 1. 05406774  |
| C  | -0. 72652035 | -3. 92736326 | 2. 21384132  |
| Sc | -2. 58077720 | -0. 73077501 | -0. 76283265 |
| Sc | 2. 56171568  | 0. 62026140  | -0. 85751237 |
| C  | -0. 63957969 | -0. 11499753 | -0. 11615357 |
| C  | 0. 58348398  | 0. 13852688  | -0. 17675945 |

**Table S4** Relative energies (in kcal/mol) of two different electronic states of some important isomers at B3LYP/6-31G(d) ~ Lanl2dz level.

---

| B3LYP/6-31G(d) ~ Lanl2dz                           | singlet state | $\Delta E$ (kcal/mol) of triplet state |
|----------------------------------------------------|---------------|----------------------------------------|
| $\text{Sc}_2\text{C}_2@ C_1(230933)\text{-C}_{98}$ | 0             | 14.9                                   |
| $\text{Sc}_2@ D_5(285913)\text{-C}_{100}$          | 0             | 19.5                                   |
| $\text{Y}_2\text{C}_2@ C_1(230933)\text{-C}_{98}$  | 0             | 15.4                                   |
| $\text{La}_2\text{C}_2@ C_1(230933)\text{-C}_{98}$ | 0             | 15.4                                   |

---

**Table S5** Relative energies (in kcal/mol) and HOMO-LUMO gaps (in eV) of  $\text{La}_2\text{C}_2@C_1(230933)\text{-C}_{98}$  and  $\text{La}_2@D_5(285913)\text{-C}_{100}$ , obtained on the levels of B3LYP/6-31G(d) ~ Lanl2dz and M06-2X/6-31G(d) ~ Lanl2dz, respectively.

|                                                   | B3LYP/6-31G(d) ~ Lanl2dz |      | M06-2X/6-31G(d) ~ Lanl2dz |      |
|---------------------------------------------------|--------------------------|------|---------------------------|------|
|                                                   | $\Delta E$               | Gap  | $\Delta E$                | Gap  |
| $\text{La}_2\text{C}_2@C_1(230933)\text{-C}_{98}$ | 34.6                     | 1.48 | 22.3                      | 2.75 |
| $\text{La}_2@D_5(285913)\text{-C}_{100}$          | 0                        | 1.54 | 0                         | 2.36 |



**Table S6** Relative energies (in kcal/mol) and HOMO-LUMO gaps (in eV) of  $Y_2C_2@C_I(230933)-C_{98}$  and  $Y_2@D_5(285913)-C_{100}$ , obtained on the levels of B3LYP/6-31G(d) ~ Lanl2dz and M06-2X/6-31G(d) ~ Lanl2dz, respectively.

|                             | B3LYP/6-31G(d) ~ Lanl2dz |      | M06-2X/6-31G(d) ~ Lanl2dz |      |
|-----------------------------|--------------------------|------|---------------------------|------|
|                             | $\Delta E$               | Gap  | $\Delta E$                | Gap  |
| $Y_2C_2@C_I(230933)-C_{98}$ | 10.7                     | 1.48 | 0.2                       | 2.77 |
| $Y_2@D_5(285913)-C_{100}$   | 0                        | 1.54 | 0                         | 2.25 |

**Table S7** Relative energies (in kcal/mol) and HOMO-LUMO gaps (in eV) of  $\text{Sc}_2\text{C}_2@C_1(230933)\text{-C}_{98}$  and  $\text{Sc}_2@D_5(285913)\text{-C}_{100}$ , obtained on the levels of B3LYP/6-31G(d) ~ Lanl2dz and M06-2X/6-31G(d) ~ Lanl2dz, respectively.

|                                                   | B3LYP/6-31G(d) ~ Lanl2dz |      | M06-2X/6-31G(d) ~ Lanl2dz |      |
|---------------------------------------------------|--------------------------|------|---------------------------|------|
|                                                   | $\Delta E$               | Gap  | $\Delta E$                | Gap  |
| $\text{Sc}_2\text{C}_2@C_1(230933)\text{-C}_{98}$ | 0.9                      | 0.90 | -8.8                      | 2.73 |
| $\text{Sc}_2@D_5(285913)\text{-C}_{100}$          | 0                        | 1.85 | 0                         | 2.59 |

**Table S8** NBO analysis of the two inside carbon atoms in cages\*.

|                                                                                 | Occupancy/<br>Bond orbital | Hybrids                                                                                                                                                                                                                                                                                                                                                                  |
|---------------------------------------------------------------------------------|----------------------------|--------------------------------------------------------------------------------------------------------------------------------------------------------------------------------------------------------------------------------------------------------------------------------------------------------------------------------------------------------------------------|
| La <sub>2</sub> C <sub>2</sub> @<br>C <sub>1</sub> (23093<br>3)-C <sub>98</sub> | 1.91619/ BD<br>(1)         | ( 49.72%) 0.7051* C 101 s( 45.30%)p 1.21( 54.62%)d 0.00( 0.07%)<br>-0.0015 0.6702 0.0619 -0.1394 -0.0085<br>0.6679 0.0744 0.2736 0.0170 -0.0071<br>-0.0020 0.0100 -0.0174 -0.0165<br>( 50.28%) 0.7091* C 102 s( 46.15%)p 1.17( 53.79%)d 0.00( 0.07%)<br>-0.0017 0.6759 0.0675 0.1320 0.0100<br>-0.6904 -0.0779 0.1939 0.0042 -0.0068<br>0.0009 -0.0040 -0.0176 -0.0178   |
|                                                                                 | 1.84201/ BD<br>(2)         | ( 48.85%) 0.6989* C 101 s( 0.01%)p99.99( 99.77%)d 17.40( 0.21%)<br>-0.0002 -0.0108 -0.0027 0.9731 -0.0647<br>0.2157 -0.0101 -0.0030 -0.0005 0.0424<br>-0.0067 -0.0015 -0.0174 -0.0006<br>( 51.15%) 0.7152* C 102 s( 0.05%)p99.99( 99.75%)d 4.38( 0.20%)<br>0.0002 0.0215 0.0021 0.9749 -0.0652<br>0.2065 -0.0102 -0.0047 0.0014 -0.0403<br>-0.0123 -0.0023 0.0161 0.0004 |
|                                                                                 | 1.76403/ BD<br>(3)         | ( 49.16%) 0.7011* C 101 s( 1.79%)p54.90( 98.01%)d 0.11( 0.20%)<br>0.0013 -0.1327 0.0155 0.0564 -0.0013<br>-0.2482 -0.0012 0.9566 -0.0153 0.0030<br>-0.0081 0.0438 0.0072 0.0016<br>( 50.84%) 0.7130* C 102 s( 1.62%)p60.56( 98.18%)d 0.12( 0.20%)<br>0.0015 -0.1261 0.0177 -0.0240 0.0001<br>0.1487 0.0038 0.9793 -0.0133 0.0006<br>0.0076 -0.0428 0.0025 -0.0076        |
| Y <sub>2</sub> C <sub>2</sub> @<br>C <sub>1</sub> (23093<br>3)-C <sub>98</sub>  | 1.91634/ BD<br>(1)         | ( 50.37%) 0.7098* C 99 s( 51.68%)p 0.93( 48.26%)d 0.00( 0.06%)<br>0.0017 -0.7170 -0.0523 0.4313 0.0337<br>-0.5070 -0.0636 -0.1841 -0.0213 0.0171<br>0.0055 -0.0067 0.0029 0.0146<br>( 49.63%) 0.7045* C 100 s( 49.41%)p 1.02( 50.52%)d 0.00( 0.06%)<br>0.0017 -0.7001 -0.0635 -0.4849 -0.0224<br>0.5125 0.0701 0.0451 0.0042 0.0186<br>0.0027 -0.0063 0.0047 0.0147      |

|                                                                                 |                    |                                                                                                                                                                                                                                                                                                                                                                       |
|---------------------------------------------------------------------------------|--------------------|-----------------------------------------------------------------------------------------------------------------------------------------------------------------------------------------------------------------------------------------------------------------------------------------------------------------------------------------------------------------------|
|                                                                                 | 1.87130/ BD<br>(2) | ( 52.55%) 0.7249* C 99 s( 2.11%)p46.35( 97.74%)d 0.07( 0.15%)<br>-0.0007 -0.1451 -0.0050 0.6678 -0.0286<br>0.6689 -0.0099 0.2882 -0.0119 0.0084<br>-0.0055 0.0090 -0.0368 -0.0005<br>( 47.45%) 0.6888* C 100 s( 1.36%)p72.27( 98.46%)d 0.13( 0.18%)<br>0.0010 0.1128 0.0299 0.6201 -0.0080<br>0.7207 -0.0131 0.2834 0.0110 -0.0085<br>-0.0019 -0.0164 0.0383 -0.0006  |
|                                                                                 | 1.81170/ BD<br>(3) | ( 51.96%) 0.7209* C 99 s( 0.04%)p99.99( 99.81%)d 4.20( 0.15%)<br>0.0008 0.0150 0.0119 -0.0192 -0.0044<br>-0.3761 0.0047 0.9253 0.0084 0.0061<br>-0.0211 0.0293 0.0122 0.0074<br>( 48.04%) 0.6931* C 100 s( 0.12%)p99.99( 99.70%)d 1.45( 0.18%)<br>0.0002 -0.0352 -0.0002 -0.1323 0.0093<br>-0.2565 -0.0009 0.9558 -0.0015 -0.0017<br>0.0217 -0.0299 -0.0120 -0.0171   |
| Sc <sub>2</sub> C <sub>2</sub> @<br>C <sub>1</sub> (23093<br>3)-C <sub>98</sub> | 1.94767/ BD<br>(1) | ( 50.03%) 0.7073* C 101 s( 56.18%)p 0.78( 43.77%)d 0.00( 0.05%)<br>-0.0010 0.7474 0.0565 0.6424 0.0746<br>0.1341 0.0158 -0.0336 0.0053 0.0077<br>-0.0021 -0.0002 0.0185 -0.0112<br>( 49.97%) 0.7069* C 102 s( 56.67%)p 0.76( 43.27%)d 0.00( 0.05%)<br>-0.0010 0.7507 0.0566 -0.6426 -0.0756<br>-0.1046 -0.0131 0.0521 0.0144 0.0067<br>-0.0031 -0.0006 0.0188 -0.0112 |
|                                                                                 | 1.85121/ BD<br>(2) | ( 50.54%) 0.7109* C 101 s( 0.17%)p99.99( 99.75%)d 0.51( 0.08%)<br>0.0002 0.0391 0.0115 0.0058 0.0025<br>-0.0025 -0.0011 0.9986 0.0140 0.0000<br>0.0275 0.0033 0.0010 -0.0083<br>( 49.46%) 0.7033* C 102 s( 0.05%)p99.99( 99.87%)d 1.59( 0.08%)<br>0.0000 0.0224 0.0042 0.1047 0.0023<br>0.0161 0.0007 0.9936 0.0173 -0.0008<br>-0.0281 -0.0052 -0.0025 -0.0001        |
|                                                                                 | 1.83052/ BD<br>(3) | ( 50.13%) 0.7080* C 101 s( 0.01%)p 1.00( 99.91%)d 0.00( 0.08%)<br>0.0001 0.0065 0.0045 -0.2117 -0.0037<br>0.9767 0.0191 0.0034 -0.0011 0.0268                                                                                                                                                                                                                         |

|  |  |                                                                                                                                                                                                                       |
|--|--|-----------------------------------------------------------------------------------------------------------------------------------------------------------------------------------------------------------------------|
|  |  | 0.0013 -0.0068 -0.0091 0.0012<br>( 49.87%) 0.7062* C 102 s( 0.02%)p99.99( 99.89%)d 3.50(<br>0.08%)<br>-0.0001 -0.0147 -0.0043 -0.1775 -0.0025<br>0.9833 0.0210 0.0031 -0.0007 -0.0267<br>0.0003 -0.0015 0.0101 0.0000 |
|--|--|-----------------------------------------------------------------------------------------------------------------------------------------------------------------------------------------------------------------------|

\*M-M bonding haven't been observed at  $M_2@C_{100}$  and  $M_2C_2@C_{98}$ .

**Figure S1** Corresponding energy orders of isomers of (a)  $\text{La}_2\text{C}_{100}$ , (b)  $\text{Y}_2\text{C}_{100}$  and (c)  $\text{Sc}_2\text{C}_{100}$ , obtained at the level of B3LYP/6-31G(d) ~ Lanl2dz. Squares indicate isomers of  $\text{M}_2\text{@C}_{100}$  ( $\text{M} = \text{La}, \text{Y}, \text{Sc}$ ), and circles indicate isomers of  $\text{M}_2\text{C}_2\text{@C}_{98}$  ( $\text{M} = \text{La}, \text{Y}, \text{Sc}$ ), respectively.

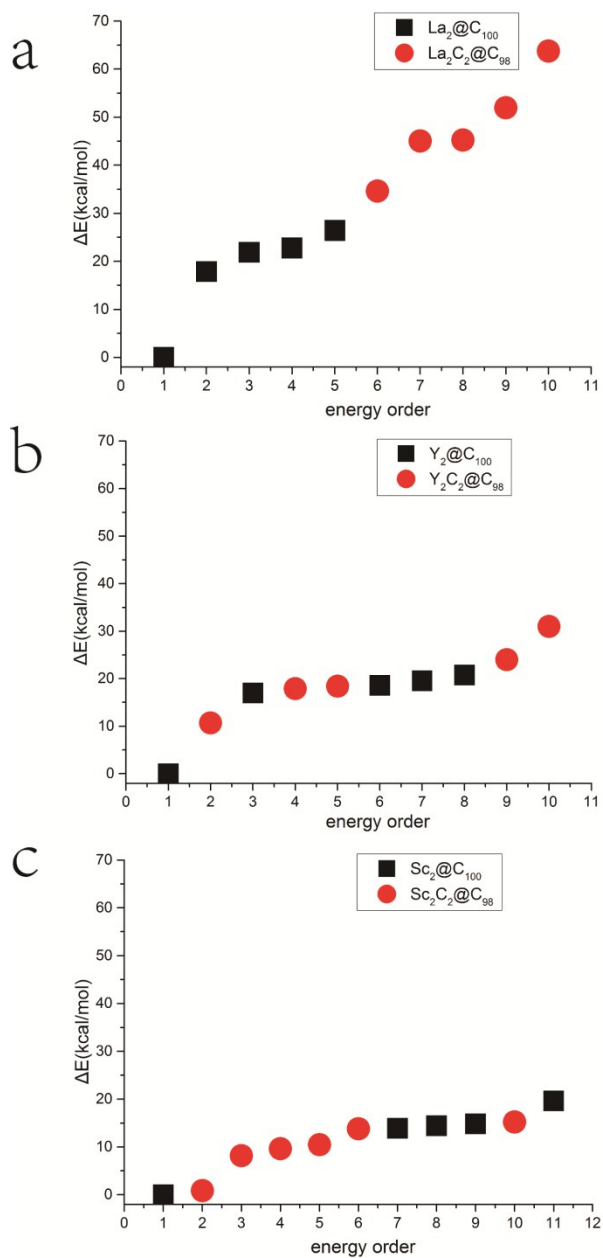

**Figure S2** NBO charge distributions of the most stable isomers of  $M_2@C_{100}$  and  $M_2C_2@C_{98}$  (M= La, Y, Sc)\*. Green represents positive charge and red represents negative charge.

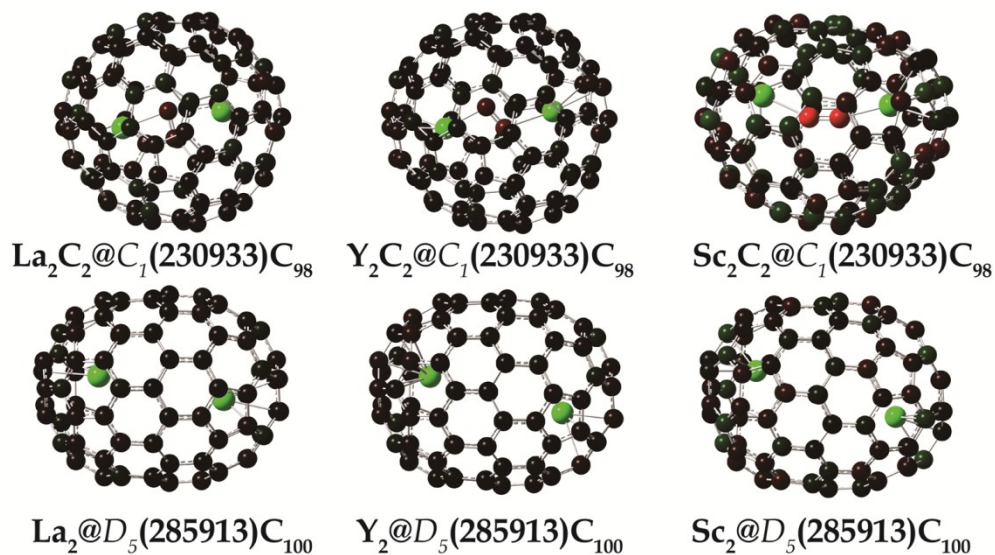

\*The calculated at B3LYP/6-31G(d)\_LANL2DZ level failed and B3LYP/6-31G(d)\_SDD level is used here.

**Figure S3** Simulated IR spectra of main  $M_2C_{100}$  isomers.

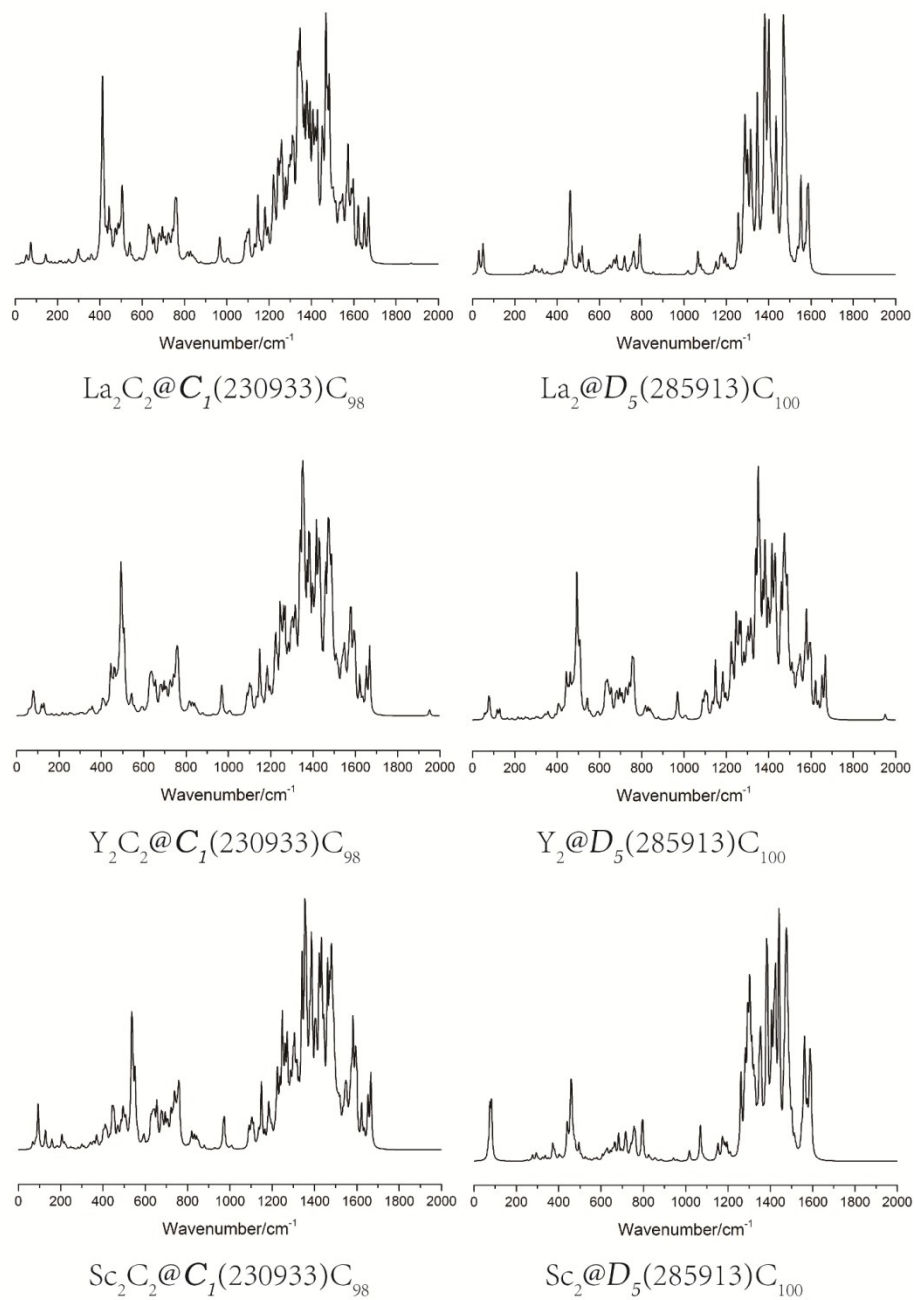

Supplement: c7ra00717e1.pdf [file c7ra00717e1.pdf]
